# Supplementary material
Source: HighWire-hosted journal article supplement (https://www.endocrinology-journals.org/content/suppl/2016/11/25/ERC-16-0422)
Supplement: supplementary_table_2.xls [file supplementary_table_2.xls]

## Sheet: Table S2
Table S2. ARVs identified in clinical samples based on unique exon junctions
	Variant	Other names	Structure	Exon Junction	Variant-specific peptide sequence	Transcriptional activity	Source (mRNA)	Detected in disease stage	Confirmed protein expression in clinical samples?	References
Inclusion of non-canonical exon/intron	AR-V1	AR4	1/2/3/CE1	3/CE1	AVVVSERILRVFGVSEWLP*	Depends on cell context	Human tissues, TCGA peritumoral and tumor samples; SUC2 tumor samples; Cell lines (22Rv1, LNCaP, VCaP, CWR-R1) and xenografts (CWR-R1 and VCaP)	Benign, hormone-naïve and CRPC; primary and metastases (higher in CRPC and metastases)	No	Cancer Genome Atlas Research Network (2015); Guo et al (2009); Hu et al (2009); Hu et al (2011); Robinson et al. (2015); Watson et al (2010);
	AR-V2		1/2/3/3/CE1	3/3	AVVVSERILRVFGVSEWLP*	Unknown	Specific to 22Rv1	Not detected	No	Hu et al (2009)
	AR-V3	AR1/2/2b	1/2/CE4	2/CE4	GFFRMNKLKESSDTNPKPYCMAAPMGLTENNRNRKKSYRETNLKAVSWPLNHT*	Constitutive	Cell lines (22Rv1; LNCaP, VCaP, and LAPC4 cells, (5% to 10% of the level of full-length AR mRNA) and xenografts (LuCaP 23.1 and 35); TCGA peritumoral and tumor samples; SUC2 tumor samples	Increased levels castrated vs non-treated xenografts; peritumoral, benign, primary tumor and mCRPC (higher in mCRPC)	No	Cancer Genome Atlas Research Network (2015); Dehm et al (2008); Hu et al (2009); Robinson et al. (2015)
	AR-V4	AR1/2/3/2b, AR5	1/2/3/CE4	3/CE4	GFFRMNKLKESSDTNPKPYCMAAPMGLTENNRNRKKSYRETNLKAVSWPLNHT*	Constitutive	Specific to 22Rv1	Not detected	No	Dehm et al (2008); Guo et al (2009); Hu et al (2009); Marcias et al. (2010)
	AR-V5		1/2/3/CE2	3/CE2	D*	Unknown	Human tissues and cell lines (22Rv1, at relative low abundance); TCGA tumor samples; SUC2 tumor samples	Primary tumor and mCRPC	No	Cancer Genome Atlas Research Network (2015); Hu et al (2009); Robinson et al. (2015)
	AR-V6		1/2/3/CE2'	3/CE2'	AGSRVS*	Unknown	Human tissues and cell lines (22Rv1, at relative low abundance); TCGA tumor samples; SUC2 tumor samples	Primary tumor and mCRPC	No	Cancer Genome Atlas Research Network (2015); Hu et al (2009); Robinson et al. (2015)
	AR-V7	AR3	1/2/3/CE3	3/CE3	EKFRVGNCKHLKMTRP*	Constitutive	Human tissues, cell lines (22Rv1, CWR-R1, C-81, VCaP, LNCaP95), xenografts (CWR-R1, VCaP and LuCaP35); TCGA peritumoral and tumor samples; SUC2 tumor samples; CTCs	Benign, hormone-naïve and CRPC; primary and metastases (higher in CRPC and metastases)	Yes, in primary, bone metastases and hormone sensitive vs CRPC and CTCs	Antonarakis et al. (2015); Antonarakis et al. (2014); Cancer Genome Atlas Research Network (2015); Corcoran et al. (2015); Efstathiou et al. (2014); Guo et al (2009); Hickey et al. (2015); Hornberg et al (2011); Hu et al (2009); McGrath et al. (2013); Onstenk et al. (2015); Qu et al. (2014); Robinson et al., (2015); Scher et al. (2016); Watson et al (2010); Welti et al. (2016)
	AR-V8		1/2/3/intron3	intron3	GFDNLCELSS*	Unknown	Cell lines (VCaP) and xenografts; TCGA tumor samples; SUC2 tumor samples	Primary tumor and mCRPC	No	Cancer Genome Atlas Research Network (2015); Robinson et al. (2015); Watson et al (2010)
	AR-V9		1/2/3/CE5	3/CE5	DNLPEQAAFWRHLHIFWDHVVKK*	Depends on cell context	Human tissues and cell lines (VCaP, 22rv1) and xenografts; TCGA tumor samples; SUC2 tumor samples	Benign, hormone-naïve and CRPC; primary and metastases (higher in CRPC and metastases)		Cancer Genome Atlas Research Network (2015); Hu et al (2011); Manish et al. (2016); Robinson et al. (2015); Watson et al (2010);
	AR-V10		1/2/3/intron3'	intron3'	PSSGTNSVFLPHRDVVRTGCRSNSGYHSCSCEYHDYCFL*	Unknown	Cell lines (VCaP) and xenografts	Not detected	No	Watson et al (2010)
	AR-V11		1/2/3/intron3''	intron3''	GKILFFLFLLLPLSPFSLIF*	Unknown	Cell lines (VCaP) and xenografts	Not detected	No	Watson et al (2010)
	AR-V16		1/2/3/4/5/6/7/8/9	9	KSHMITPDAMYL* (8 aa replace the last 33 aa of exon 8)	Unknown	VCaP, MDA-MB-453	Not detected	No	Hu et al. (2014)
	AR-V17		1/2/3/4/5/6/7/8/9	9	ILSGSHLMPCTCERGCSFVLEALSEQTRHLD* (27aa replace the last 10 aa of exon 8)	Unknown	MDA-MB-453	Not detected	No	Hu et al. (2014)
	AR8	AR-V15	1/intron2/3	intron2	NTRRKRLWKLIIRSINSCICSPRETEVPVRQQK*	Increases phosphorylation of AR-FL	Human tissues and cell lines (C4-2, C4-2B, 22Rv1, CWR-R1 )	Benign, malignant	No	Yang et al (2011)
	AR23		1/2/intron2/3/4/5/6/7/8	2/intron2/3	EIPEERDSGNSCSELSTLVFVLP	Ligand-stimulated	TCGA peritumoral and tumor samples; SUC2 tumor samples	Peritumoral, primary tumor and mCRPC	No	Jagla et al. (2007)
Exon skipping	ARv567es	AR-V12	1/2/3/4/8	4/8		Constitutive	Human tissues and cell lines (22Rv1, VCaP, TALEN-engineered R1-I567) and xenografts (pre and post castration); SUC2 tumor samples	Benign, hormone-naïve and CRPC (higher in CRPC xenografts and bone metastases over hormone-naïve)	Yes, in LuCaP 86.2 xenografts and TMA of 155 metastases from patients	Cancer Genome Atlas Research Network (2015); Guo et al. (2009); Hornberg et al (2011); Hu et al (2011); Liu et al. (2015); Nyquist et al. (2013); Robinson et al. (2015); Sun et al (2010)
	AR-V13		1/2/3/4/5/6/9	6/9	NHT*	Inactive	Human tissues and cell lines (22Rv1); TCGA tumor samples; SUC2 tumor samples	Primary tumor and mCRPC (higher in mCRPC)	No	Cancer Genome Atlas Research Network (2015); Hu et al (2011); Robinson et al. (2015)
	AR-V14		1/2/3/4/5/6/7/9	7/9	ITPDAMYL*	Inactive	Human tissues and cell lines (22Rv1); TCGA peritumoral and tumor samples; SUC2 tumor samples	CRPC	No	Cancer Genome Atlas Research Network (2015); Hu et al (2011)
	AR-V15		1/2/3/4/5/6/9	6/9	SPVKEQRDKKSRGHDTLYFTSSRQMNVESIKTQWN* (35 aa added to the end of exon 6)	Unknown	VCaP, MDA-MB-453	Not detected	No	Hu et al. (2014)
	AR-V18		1/2/3/4/5/6/9	6/9	LFSISSRSHLMPCTCERGCSFVLEALSEQTRHLD* (30 aa added to the end of exon 6)	Unknown	VCaP, MDA-MB-453	Not detected	No	Hu et al. (2014)
	ARv5es		Unknown	4/6	Unknown	Unknown	TCGA tumor samples; SUC2 tumor samples	Primary tumor and mCRPC (higher in mCRPC)	No	Cancer Genome Atlas Research Network (2015); Robinson et al. (2015)
	ARv56es		Unknown	4/7	Unknown	Unknown	SUC2 tumor samples	mCRPC	No	Cancer Genome Atlas Research Network (2015); Robinson et al. (2015)
	ARv7es		Unknown	6/8	Unknown	Unknown	TCGA tumor samples; SUC2 tumor samples	Primary tumor and mCRPC (higher in mCRPC)	No	Cancer Genome Atlas Research Network (2015); Robinson et al. (2015)
	exon2-3		Unknown	long exon 3	Unknown	Unknown	TCGA peritumoral and tumor samples; SUC2 tumor samples	Peritumoral, primary tumor and mCRPC (higher in mCRPC)	No	Robinson et al. (2015)
	exon 3-5		Unknown	3/5	Unknown	Unknown	TCGA tumor samples; SUC2 tumor samples	Primary tumor and mCRPC (higher in mCRPC)	No	Robinson et al. (2015)
	exon 5-7		Unknown	5/7	Unknown	Unknown	TCGA tumor samples; SUC2 tumor samples	Primary tumor and mCRPC	No	Robinson et al. (2015)
	exon 1-CE4		Unknown	1/CE4	Unknown	Unknown	SUC2 tumor samples	mCRPC	No	Robinson et al. (2015)
	exon 1-3		Unknown	1/3	Unknown	Unknown	TCGA peritumoral and tumor samples; SUC2 tumor samples	Peritumoral, primary tumor and mCRPC	No	Robinson et al. (2015)
	exon 2-4		Unknown	2/4	Unknown	Unknown	TCGA peritumoral and tumor samples; SUC2 tumor samples	Peritumoral, primary tumor and mCRPC	No	Robinson et al. (2015)
	exon 2-5		Unknown	2/5	Unknown	Unknown	TCGA tumor samples; SUC2 tumor samples	Primary tumor and mCRPC	No	Robinson et al. (2015)
Promoter usage	AR-45		1b/2/3/4/5/6/7/8	1b/2	MILWLHS	Depends on cell context	TCGA peritumoral and tumor samples; SUC2 tumor samples	Peritumoral, benign, primary tumor and mCRPC	No	Ahrens-Fath et al. (2005); Cancer Genome Atlas Research Network (2015); Robinson et al. (2015)
	* Stop Codon
AR-V, androgen receptor variant
AR-FL, androgen receptor full-length
CE, cryptic exon
CRPC, castration-resistant prostate cancer
mCRPC, metastatic castration-resistant prostate cancer
SUC2, stand up to cancer cohort
TCGA, the cancer genome atlas cohort
TMA, tissue microarrays

## Sheet: References
Ahrens-Fath I, Politz O, Geserick C & Haendler B 2005 Androgen receptor function is modulated by the tissue-specific AR45 variant. FEBS J 272 74-84.
Antonarakis ES, Lu C, Luber B, Wang H, Chen Y, Nakazawa M, Nadal R, Paller CJ, Denmeade SR, Carducci MA, et al. 2015 Androgen Receptor Splice Variant 7 and Efficacy of Taxane Chemotherapy in Patients With Metastatic Castration-Resistant Prostate Cancer. JAMA Oncol 1 582-591.
Antonarakis ES, Lu C, Wang H, Luber B, Nakazawa M, Roeser JC, Chen Y, Mohammad TA, Chen Y, Fedor HL, et al. 2014 AR-V7 and resistance to enzalutamide and abiraterone in prostate cancer. N Engl J Med 371 1028-1038.
Cancer Genome Atlas Research N 2015 The Molecular Taxonomy of Primary Prostate Cancer. Cell 163 1011-1025.
Corcoran Niall HC, Howard Nicholas, Bugeja Patricia, Kerger Michael, Peters Justin, Clarke David, Grummet Jeremy, Dundee Phillip, Pedersen John, Ryan Andrew, Costello Anthony, Ruljancich Paul, Parente Phillip 2015 The predictive value of ARv7 expression in localized prostate caner treated with abiraterone, degarelix, and bicalutamide [abstract]. J Clin Oncol 33 abstr 71.
Dehm SM, Schmidt LJ, Heemers HV, Vessella RL & Tindall DJ 2008 Splicing of a novel androgen receptor exon generates a constitutively active androgen receptor that mediates prostate cancer therapy resistance. Cancer Res 68 5469-5477.
Efstathiou E, Titus M, Wen S, Hoang A, Karlou M, Ashe R, Tu SM, Aparicio A, Troncoso P, Mohler J, et al. 2015 Molecular characterization of enzalutamide-treated bone metastatic castration-resistant prostate cancer. Eur Urol 67 53-60.
Guo Z, Yang X, Sun F, Jiang R, Linn DE, Chen H, Chen H, Kong X, Melamed J, Tepper CG, et al. 2009 A novel androgen receptor splice variant is up-regulated during prostate cancer progression and promotes androgen depletion-resistant growth. Cancer Res 69 2305-2313.
Hickey TE, Irvine CM, Dvinge H, Tarulli GA, Hanson AR, Ryan NK, Pickering MA, Birrell SN, Hu DG, Mackenzie PI, et al. 2015 Expression of androgen receptor splice variants in clinical breast cancers. Oncotarget 6 44728-44744.
Hornberg E, Ylitalo EB, Crnalic S, Antti H, Stattin P, Widmark A, Bergh A & Wikstrom P 2011 Expression of androgen receptor splice variants in prostate cancer bone metastases is associated with castration-resistance and short survival. PLoS One 6 e19059.
Hu DG, Hickey TE, Irvine C, Wijayakumara DD, Lu L, Tilley WD, Selth LA & Mackenzie PI 2014 Identification of androgen receptor splice variant transcripts in breast cancer cell lines and human tissues. Horm Cancer 5 61-71.
Hu R, Dunn TA, Wei S, Isharwal S, Veltri RW, Humphreys E, Han M, Partin AW, Vessella RL, Isaacs WB, et al. 2009 Ligand-independent androgen receptor variants derived from splicing of cryptic exons signify hormone-refractory prostate cancer. Cancer Res 69 16-22.
Hu R, Isaacs WB & Luo J 2011 A snapshot of the expression signature of androgen receptor splicing variants and their distinctive transcriptional activities. Prostate 71 1656-1667.
Jagla M, Feve M, Kessler P, Lapouge G, Erdmann E, Serra S, Bergerat JP & Ceraline J 2007 A splicing variant of the androgen receptor detected in a metastatic prostate cancer exhibits exclusively cytoplasmic actions. Endocrinology 148 4334-4343.
Kohli Manish HDW, Carlson Rachel, Wang Rachel, Li Ying, Winston Tan, Ho Thai Huu, Sicotte Hugues, Wang Liewei, Costello Brian Addis, Pitot Henry C., Quevedo Fernando, Dronca Roxana Stefania, Moynihan Timothy Jerome, Atwell Thomas D, Eiken Patrick W, McMenomy Brendan P, Bryce Alan Haruo, Wu Kevin, Dehm Scott 2016 Association of androgen receptor V9 (ARV9) mRNA expression in metastatic tissue with …
Marcias G, Erdmann E, Lapouge G, Siebert C, Barthelemy P, Duclos B, Bergerat JP, Ceraline J & Kurtz JE 2010 Identification of novel truncated androgen receptor (AR) mutants including unreported pre-mRNA splicing variants in the 22Rv1 hormone-refractory prostate cancer (PCa) cell line. Hum Mutat 31 74-80.
McGrath MJ, Binge LC, Sriratana A, Wang H, Robinson PA, Pook D, Fedele CG, Brown S, Dyson JM, Cottle DL, et al. 2013 Regulation of the transcriptional coactivator FHL2 licenses activation of the androgen receptor in castrate-resistant prostate cancer. Cancer Res 73 5066-5079.
Onstenk W, Sieuwerts AM, Kraan J, Van M, Nieuweboer AJ, Mathijssen RH, Hamberg P, Meulenbeld HJ, De Laere B, Dirix LY, et al. 2015 Efficacy of Cabazitaxel in Castration-resistant Prostate Cancer Is Independent of the Presence of AR-V7 in Circulating Tumor Cells. Eur Urol 68 939-945.
Qu Y, Dai B, Ye D, Kong Y, Chang K, Jia Z, Yang X, Zhang H, Zhu Y & Shi G 2015 Constitutively active AR-V7 plays an essential role in the development and progression of castration-resistant prostate cancer. Sci Rep 5 7654.
Robinson D, Van Allen EM, Wu YM, Schultz N, Lonigro RJ, Mosquera JM, Montgomery B, Taplin ME, Pritchard CC, Attard G, et al. 2015 Integrative clinical genomics of advanced prostate cancer. Cell 161 1215-1228.
Scher HI, Lu D, Schreiber NA, Louw J, Graf RP, Vargas HA, Johnson A, Jendrisak A, Bambury R, Danila D, et al. 2016 Association of AR-V7 on Circulating Tumor Cells as a Treatment-Specific Biomarker With Outcomes and Survival in Castration-Resistant Prostate Cancer. JAMA Oncol.
Watson PA, Chen YF, Balbas MD, Wongvipat J, Socci ND, Viale A, Kim K & Sawyers CL 2010 Constitutively active androgen receptor splice variants expressed in castration-resistant prostate cancer require full-length androgen receptor. Proc Natl Acad Sci U S A 107 16759-16765.
Welti J, Rodrigues DN, Sharp A, Sun S, Lorente D, Riisnaes R, Figueiredo I, Zafeiriou Z, Rescigno P, de Bono JS, et al. 2016 Analytical Validation and Clinical Qualification of a New Immunohistochemical Assay for Androgen Receptor Splice Variant-7 Protein Expression in Metastatic Castration-resistant Prostate Cancer. Eur Urol.
Yang X, Guo Z, Sun F, Li W, Alfano A, Shimelis H, Chen M, Brodie AM, Chen H, Xiao Z, et al. 2011 Novel membrane-associated androgen receptor splice variant potentiates proliferative and survival responses in prostate cancer cells. J Biol Chem 286 36152-36160.
